# Supplementary material for: Vaccination and Factors Related to the Clinical Outcome of COVID-19 in Healthcare Workers—A Romanian Front-Line Hospital’s Experience
Source: MDPI journal article supplement (doi:10.3390/vaccines11050899), 2023-04-25
Supplement: s1 [file s1]

## Supplementary Material

**Table S1.** COVID-19 cases in HCWs and general population, April 2020 – Dec 2021, Romania (the extracted data from National Center for Surveillance and Disease Control weekly reports) .

| Year | Month | Week             | Cumulative<br>number of cases in<br>HCWs | Weekly cases in<br>HCWs | Cumulative<br>number of cases in<br>Roumanian<br>population | Weekly cases in<br>Roumanian<br>population |
|------|-------|------------------|------------------------------------------|-------------------------|-------------------------------------------------------------|--------------------------------------------|
| 2020 | APR   | 30.03-05.04.2020 | 662                                      |                         | 4068                                                        |                                            |
| 2020 | APR   | 06.04-12.04.2020 | 903                                      | 241                     | 6633                                                        | 2565                                       |
| 2020 | APR   | 13.04-19.04.2020 | 1213                                     | 310                     | 8936                                                        | 2303                                       |
| 2020 | APR   | 20.04-26.04.2020 | 1286                                     | 73                      | 11313                                                       | 2377                                       |
| 2020 | MAY   | 27.04-03.05.2020 | 1771                                     | 485                     | 13552                                                       | 2239                                       |
| 2020 | MAY   | 04.05-10.05.2020 | 2264                                     | 493                     | 15501                                                       | 1949                                       |
| 2020 | MAY   | 11.05-17.05.2020 | 2601                                     | 337                     | 16895                                                       | 1394                                       |
| 2020 | MAY   | 18.05-24.05.2020 | 2763                                     | 162                     | 18283                                                       | 1388                                       |
| 2020 | MAY   | 25.05-31.05.2020 | 2865                                     | 102                     | 19400                                                       | 1117                                       |
| 2020 | JUN   | 01.06-07.06.2020 | 2909                                     | 44                      | 20605                                                       | 1205                                       |
| 2020 | JUN   | 08.06-14.06.2020 | 3000                                     | 91                      | 22160                                                       | 1555                                       |
| 2020 | JUN   | 15.06-21.06.2020 | 3149                                     | 149                     | 24284                                                       | 2124                                       |
| 2020 | JUN   | 22.06-28.06.2020 | 3267                                     | 118                     | 26582                                                       | 2298                                       |
| 2020 | JUL   | 29.06-05.07.2020 | 3335                                     | 68                      | 29224                                                       | 2642                                       |
| 2020 | JUL   | 06.07-12.07.2020 | 3422                                     | 87                      | 32946                                                       | 3722                                       |
| 2020 | JUL   | 13.07-19.07.2020 | 3567                                     | 145                     | 38139                                                       | 5193                                       |
| 2020 | JUL   | 20.07-26.07.2020 | 3714                                     | 147                     | 45902                                                       | 7763                                       |
| 2020 | AUG   | 27.07-02.08.2020 | 3849                                     | 135                     | 54009                                                       | 8107                                       |
| 2020 | AUG   | 03.08-09.08.2020 | 3992                                     | 143                     | 62547                                                       | 8538                                       |
| 2020 | AUG   | 10.08-16.08.2020 | 4134                                     | 142                     | 71194                                                       | 8647                                       |
| 2020 | AUG   | 17.08-23.08.2020 | 4266                                     | 132                     | 79330                                                       | 8136                                       |
| 2020 | AUG   | 24.08-30.08.2020 | 4378                                     | 112                     | 87549                                                       | 8219                                       |
| 2020 | SEPT  | 31.08-06.09.2020 | 4673                                     | 295                     | 95897                                                       | 8348                                       |
| 2020 | SEPT  | 07.09-13.09.2020 | 4683                                     | 10                      | 104187                                                      | 8290                                       |
| 2020 | SEPT  | 14.09-20.09.2020 | 4776                                     | 93                      | 113589                                                      | 9402                                       |
| 2020 | SEPT  | 21.09-27.09.2020 | 4922                                     | 146                     | 123944                                                      | 10355                                      |
| 2020 | OCT   | 28.09-04.10.2020 | 4997                                     | 75                      | 137491                                                      | 13547                                      |
| 2020 | OCT   | 05.10-11.10.2020 | 5346                                     | 349                     | 157352                                                      | 19861                                      |
| 2020 | OCT   | 12.10-18.10.2020 | 5623                                     | 277                     | 182854                                                      | 25502                                      |
| 2020 | OCT   | 19.10-25.10.2020 | 6327                                     | 704                     | 250704                                                      | 67850                                      |
| 2020 | OCT   | 26.10-01.11.2020 | 6636                                     | 309                     | 306991                                                      | 56287                                      |
| 2020 | NOV   | 02.11-08.11.2020 | 6955                                     | 319                     | 365212                                                      | 58221                                      |
| 2020 | NOV   | 09.11-15.11.2020 | 7370                                     | 415                     | 422852                                                      | 57640                                      |
| 2020 | NOV   | 16.11-22.11.2020 | 7842                                     | 472                     | 475362                                                      | 52510                                      |
| 2020 | NOV   | 23.11-29.11.2020 | 8154                                     | 312                     | 517236                                                      | 41874                                      |
| 2020 | DEC   | 30.11-06.12.2020 | 8942                                     | 788                     | 559587                                                      | 42351                                      |
| 2020 | DEC   | 07.12-13.12.2020 | 8951                                     | 9                       | 593783                                                      | 34196                                      |
| 2020 | DEC   | 14.12-20.12.2020 | 9312                                     | 361                     | 618429                                                      | 24646                                      |
| 2020 | DEC   | 21.12-27.12.2020 | 9803                                     | 491                     | 643559                                                      | 25130                                      |
| 2021 | JAN   | 04.01-10.01.2021 | 10338                                    | 535                     | 673271                                                      | 29712                                      |
| 2021 | JAN   | 11.01-17.01.2021 | 10646                                    | 308                     | 695153                                                      | 21882                                      |

|      |      |                  |       |      |         |        |
|------|------|------------------|-------|------|---------|--------|
| 2021 | JAN  | 18.01-24.01.2021 | 10812 | 166  | 712561  | 17408  |
| 2021 | JAN  | 25.01-31.01.2021 | 11021 | 209  | 730056  | 17495  |
| 2021 | FEBR | 01.02-07.02.2021 | 11208 | 187  | 746637  | 16581  |
| 2021 | FEBR | 08.02-14.02.2021 | 12368 | 1160 | 763294  | 16657  |
| 2021 | FEBR | 15.02-21.02.2021 | 12523 | 155  | 781329  | 18035  |
| 2021 | FEBR | 22.02-28.02.2021 | 12607 | 84   | 804090  | 22761  |
| 2021 | MAR  | 01.03-07.03.2021 | 12725 | 118  | 830563  | 26473  |
| 2021 | MAR  | 08.03-14.02.2021 | 13087 | 362  | 862681  | 32118  |
| 2021 | MAR  | 15.03-21.03.2021 | 13093 | 6    | 900858  | 38177  |
| 2021 | MAR  | 22.03-28.03.2021 | 13264 | 171  | 904443  | 3585   |
| 2021 | APR  | 29.03-04.04.2021 | 13492 | 228  | 977986  | 73543  |
| 2021 | APR  | 05.04-11.04.2021 | 13646 | 154  | 1008490 | 30504  |
| 2021 | APR  | 12.04-18.04.2021 | 13729 | 83   | 1031072 | 22582  |
| 2021 | APR  | 19.04-25.04.2021 | 13799 | 70   | 1047520 | 16448  |
| 2021 | APR  | 26.04-02.05.2021 | 13861 | 62   | 1050337 | 2817   |
| 2021 | MAY  | 03.05-09.05.2021 | 13925 | 64   | 1066731 | 16394  |
| 2021 | MAY  | 10.05-16.05.2021 | 13951 | 26   | 1072291 | 5560   |
| 2021 | MAY  | 17.05-23.05.2021 | 13969 | 18   | 1075773 | 3482   |
| 2021 | MAY  | 24.05-30.05.2021 | 13995 | 26   | 1077735 | 1962   |
| 2021 | JUN  | 31.05-06.06.2021 | 14027 | 32   | 1078952 | 1217   |
| 2021 | JUN  | 07.06-13.06.2021 | 14122 | 95   | 1079776 | 824    |
| 2021 | JUN  | 14.06-20.06.2021 | 14142 | 20   | 1080282 | 506    |
| 2021 | JUN  | 21.06-27.06.2021 | 14221 | 79   | 1080667 | 385    |
| 2021 | JUL  | 28.06-04.07.2021 | 14265 | 44   | 1080979 | 312    |
| 2021 | JUL  | 05.07-11.07.2021 | 14314 | 49   | 1081275 | 296    |
| 2021 | JUL  | 12.07-18.07.2021 | 14379 | 65   | 1081678 | 403    |
| 2021 | JUL  | 19.07-25.07.2021 | 14405 | 26   | 1082376 | 698    |
| 2021 | AUG  | 26.07-01.08.2021 | 14432 | 27   | 1083478 | 1102   |
| 2021 | AUG  | 02.08-08.08.2021 | 14476 | 44   | 1085100 | 1622   |
| 2021 | AUG  | 09.08-15.08.2021 | 14495 | 19   | 1087509 | 2409   |
| 2021 | AUG  | 16.08-22.08.2021 | 14523 | 28   | 1091340 | 3831   |
| 2021 | AUG  | 23.08-29.08.2021 | 14572 | 49   | 1097452 | 6112   |
| 2021 | SEPT | 30.08-05.09.2021 | 14653 | 81   | 1107043 | 9591   |
| 2021 | SEPT | 06.09-12.09.2021 | 14757 | 104  | 1122654 | 15611  |
| 2021 | SEPT | 13.09-19.09.2021 | 15006 | 249  | 1152052 | 29398  |
| 2021 | SEPT | 20.09-26.09.2021 | 15338 | 332  | 1199761 | 47709  |
| 2021 | OCT  | 27.09-03.10.2021 | 15527 | 189  | 1274119 | 74358  |
| 2021 | OCT  | 04.10-10.10.2021 | 15765 | 238  | 1365788 | 91669  |
| 2021 | OCT  | 11.10-17.10.2021 | 16418 | 653  | 1467401 | 101613 |
| 2021 | OCT  | 18.10-24.10.2021 | 16754 | 336  | 1571115 | 103714 |
| 2021 | OCT  | 25.10-31.10.2021 | 16988 | 234  | 1655024 | 83909  |
| 2021 | NOV  | 01.11-07.11.2021 | 17182 | 194  | 1711137 | 56113  |
| 2021 | NOV  | 08.11-14.11.2021 | 17321 | 139  | 1744440 | 33303  |
| 2021 | NOV  | 15.11-21.11.2021 | 17392 | 71   | 1764251 | 19811  |
| 2021 | NOV  | 22.11-28.11.2021 | 17441 | 49   | 1778045 | 13794  |
| 2021 | DEC  | 29.11-05.12.2021 | 17479 | 38   | 1786839 | 8794   |
| 2021 | DEC  | 06.12-12.12.2021 | 17508 | 29   | 1793643 | 6804   |
| 2021 | DEC  | 13.12-19.12.2021 | 17538 | 30   | 1798629 | 4986   |
| 2021 | DEC  | 20.12-16.12.2021 | 17556 | 18   | 1803311 | 4682   |
| 2021 | DEC  | 27.12-02.01.2022 | 17584 | 28   | 1813056 | 9745   |

---

Source: National Center for Surveillance and Control of Communicable Disease.  
COVID-19 Confirmed Cases Analysis. Available online:  
<https://www.cnsct.ro/index.php/analiza-cazuri-confirmate-covid19> (accessed  
on 15 March 2023).
